# Supplementary material
Source: Springer Nature journal article supplement (https://www.springermedizin.de/resource/supplementary/12913_2007_587_MOESM2_ESM.pdf/9535484)
Supplement: MOESM2 [file 9535484]

The diagram consists of five nested and overlapping shapes. The outermost shape is a large oval labeled 'International Environment'. Inside it is a smaller oval labeled 'National environment'. Within the 'National environment' are three overlapping shapes: a large oval on the left labeled 'Local environment (home and social)', a smaller circle at the bottom labeled 'Individual', and a smaller oval on the right labeled 'Work environment'. The 'Local environment' overlaps with the 'Individual' circle, and the 'Individual' circle overlaps with the 'Work environment' oval.

International  
Environment

National environment

Local environment  
(home and social)

Work  
environment

Individual
